# Supplementary material for: A highly sensitive and selective on–off fluorescent sensor based on a complex of polySchiff-Fe2+ for Cr(vi) detection in an aqueous medium
Source: Royal Society of Chemistry journal article supplement (doi:10.1039/d0ra07458f), 2021-01-01
Supplement: d0ra07458f1.pdf [file d0ra07458f1.pdf]

**A highly sensitive and selective on-off fluorescent sensor based on complex of Polyschiff-Fe<sup>2+</sup> for Cr(VI) detection in the aqueous medium**

Zhiying Li\*, Congshu Li, Huiyun Yan

<sup>a</sup> Department of Chemistry, Xinzhou Teachers University, Xinzhou 034000, China

\*Corresponding author

E-mail address: [lizhiying8001@163.com](mailto:lizhiying8001@163.com)

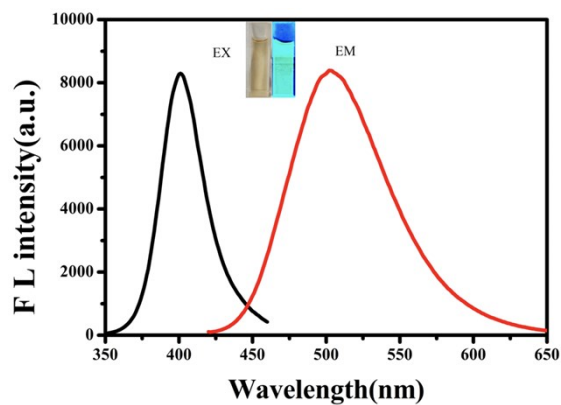

**Fig. S1.** The Excitation and emission spectra of PS-Fe<sup>2+</sup>

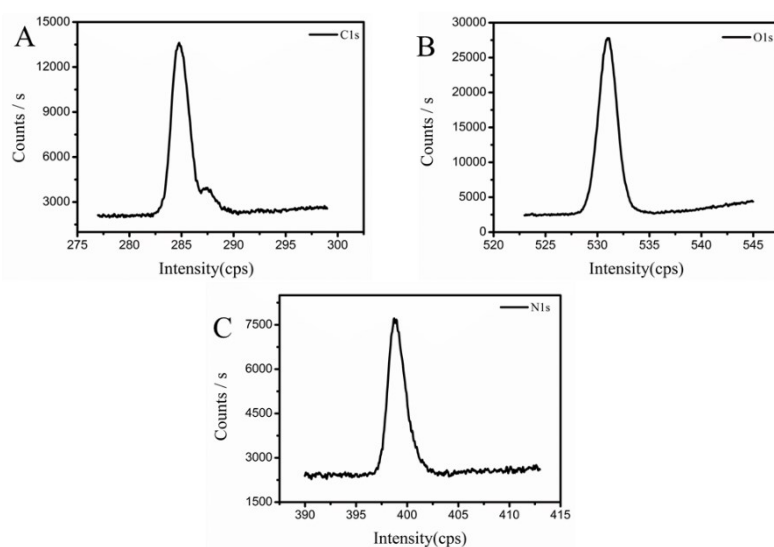

**Fig. S2.** High-resolution XPS survey scan of (A) C 1s, (B) O 1s, (C) N 1s, spectra of PS-Fe<sup>2+</sup>

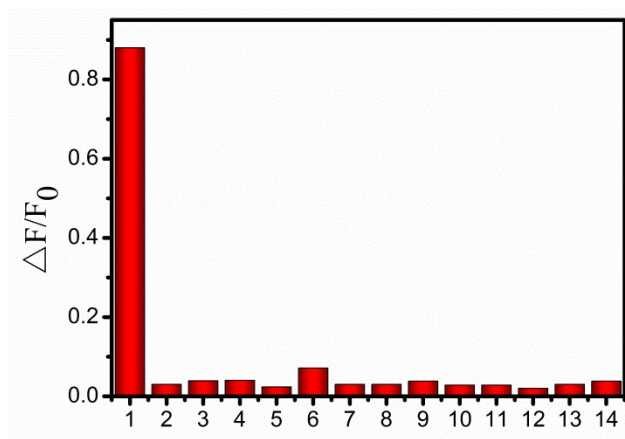

**Fig. S3.** Selectivity of determination method of PS-Fe<sup>2+</sup>

Cr<sub>2</sub>O<sub>7</sub><sup>2-</sup>, Cu<sup>2+</sup>, Mn<sup>2+</sup>, Pb<sup>2+</sup>, Ag<sup>+</sup>, Hg<sup>+</sup>, Ba<sup>2+</sup>, Cd<sup>2+</sup>, Cr<sup>3+</sup>, SO<sub>4</sub><sup>2-</sup>, NO<sub>2</sub><sup>-</sup>, SCN<sup>-</sup>, PO<sub>4</sub><sup>3-</sup> and C<sub>2</sub>O<sub>4</sub><sup>2-</sup>.

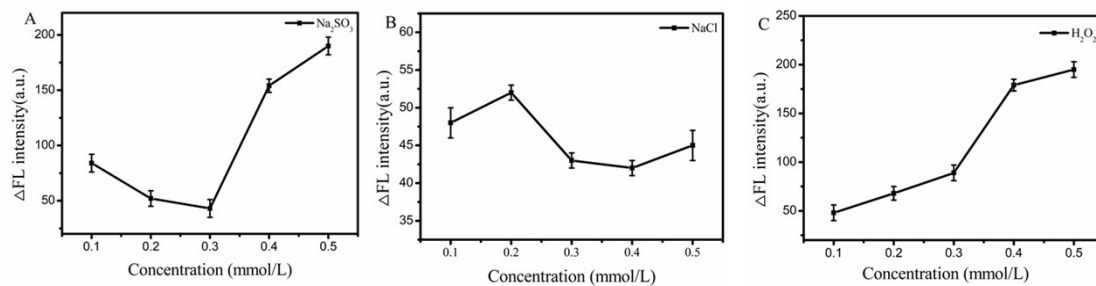

**Fig. S4.** Fluorescence intensity stability of the PS-Fe<sup>2+</sup> of NaCl, Na<sub>2</sub>SO<sub>3</sub> and H<sub>2</sub>O<sub>2</sub>

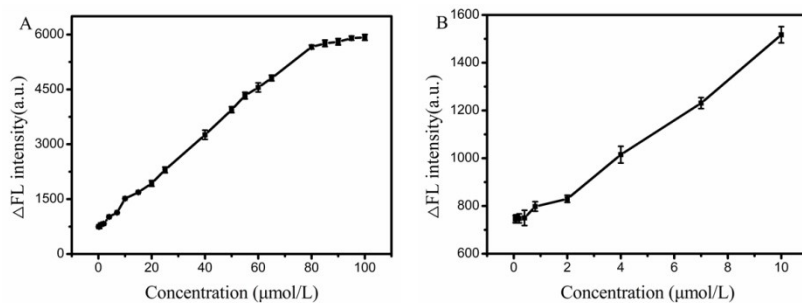

**Fig. S5.** Correlation analysis of Cr(VI) using PS-Fe<sup>2+</sup>. (A) Fluorescence quenching of PS-Fe<sup>2+</sup> containing system upon different concentrations of  $\text{Cr}_2\text{O}_7^{2-}$  (0.01--100  $\mu\text{M}$ ) addition; (B) Fluorescence quenching of PS-Fe<sup>2+</sup> containing system upon different concentrations of  $\text{Cr}_2\text{O}_7^{2-}$  (0.01--10  $\mu\text{M}$ ) addition.
